# Supplementary material
Source: HighWire-hosted journal article supplement (http://hw-f5-jim.highwire.org/highwire/filestream/138515/field_highwire_adjunct_files/3/AFMR_Virtual_Education_and_Podcasts_2021_69_4.pdf)
Supplement: AFMR_Virtual_Education_and_Podcasts_2021_69_4.pdf [file AFMR_Virtual_Education_and_Podcasts_2021_69_4.pdf]

# AFMR Virtual Education & Podcasts

**Develop & Mentor Tomorrow's Leaders in Medical Research.**

## **PODCASTS | [afmr.org/podcasts](https://afmr.org/podcasts)**

Visit the podcast page for the latest from AFMR leaders and members regarding important and exciting research that is being done.

### **Latest from the AFMR Podcast**

#### **Health Disparities in the Latinx Community During the COVID19 Pandemic**

*Interview with Omar Matuk, MD (University of Houston College of Medicine) & Ilan Shapiro, MD (Altamed, Los Angeles, CA)*

Interviewed by Ricardo Correa, MD

September 2020

### **Latest from the JIM Podcast**

#### **Thyroid Awareness Month with Tamis Bright**

Guest: Tamis Bright, MD, Texas Tech University Health Sciences Center El Paso

Interviewed by JIM editor-in-chief Richard McCallum, MD

January 20, 2021

## **VIRTUAL EDUCATION | [afmr.org/virtual](https://afmr.org/virtual)**

Visit for details on upcoming workshops and symposia.

### **Becoming a physician scientist: How to incorporate research into your medical training and career**

Speakers:

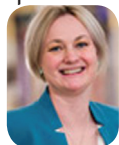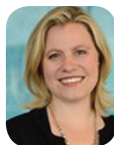

Melanie Cree-Green, MD, PhD

Shanlee Davis, MD, MSCS

*University of Colorado - Anschutz Medical Campus*

### **How to Write a Manuscript Workshop**

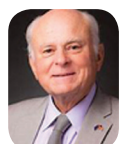

Lead: Richard McCallum, MD - Editor-in-Chief, *Journal of Investigative Medicine (JIM)*

And more...visit [afmr.org/virtual/education/archive](https://afmr.org/virtual/education/archive) for free access to all previous workshops.

**AFMR Administrative Offices | 500 Cummings Center, Suite 4400, Beverly, MA 01915 | [admin@afmr.org](mailto:admin@afmr.org)**  
**Supervising Director: Aurelie Alger, JD | Administrator: Leslie J. Yerman | Meeting Manager: Taylor Baumgartner**
